# Supplementary material
Source: PubMed Central journal article supplement (PMC1952200)
Supplement: pmed.0040257.sd002.pdf [file pmed.0040257.sd002.pdf]

LE CABINET

4992

N° /MSHP/CAB / CNESVS

Abidjan, le 03 NOV. 2006

/-)

Professeur François DABIS  
ISPED Université Victor Segalen  
Bordeaux (France)  
S/C du professeur N'DRI YOMAN T.  
UFR des Sciences Médicales  
Université d'Abidjan

ABIDJAN

**Objet :** NL n° 1656/027/MSHP/CNEVS/CAB1/kg/  
du 7 avril 2006 relative à votre demande  
d'autorisation à participer à la Collaboration  
internationale ART-LINC et KIDS ART LINC.

Professeur,

Le Comité National d'Ethique des Sciences de la Vie et de la Santé a bien reçu votre lettre du 07/06/2006 faisant suite à celle citée en objet.

Après examen de son contenu, de la note d'information aux parents pour la collecte et l'informatisation des données de leur enfant, des accords des sites et des principes de collaboration en date de juin 2006, le Comité National d'Ethique des Sciences de la Vie et de la Santé a noté avec satisfaction la prise en compte de ses observations contenues dans la lettre ci-dessus référencée.

En conséquence, je vous donne mon accord pour la mise en œuvre des Projets de collaboration KIDS-ART-LINC et ART-LINC. Il en est de même de l'utilisation des données des patients décédés et des patients perdus de vue lors de la mise en œuvre des Protocoles ART-LINC ET KIDS ART-LINC.

En vous souhaitant bonne réception, je vous prie d'agréer, Professeur, l'expression de ma considération distinguée.

Pour le Ministre et par Délégation  
Le Directeur de Cabinet Adjoint

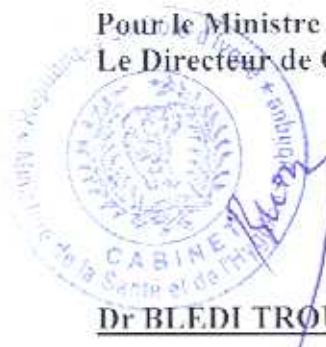

Dr BLEDI TROUIN Félix
