# Supplementary material
Source: PubMed Central journal article supplement (PMC1952200)
Supplement: pmed.0040257.sd003.pdf [file pmed.0040257.sd003.pdf]

# Columbia University Human Subjects Study Description Data Sheet

---

**Protocol:** IRB-AAA5282(Y2M00)      **Protocol Status:** Approved  
**Renewal**

**Effective Date:** 01/01/2001  
**Expiration Date:** 12/31/2007

**Originating Department:**      **MSPH DEAN'S OFFICE (475-00-47500)**  
**Submitting To:**                    **Medical Center**  
**Title:**                                **MTCT-Plus Initiative**  
**Sponsor Protocol Version#:**  
**Abbreviated title:**                **MTCT Plus Initiatve**

**Affiliated Institutions:**  
**Protocol Begin Date:**            00/00/0000  
**Protocol End Date:**                00/00/0000  
**Previous Protocol Number:**    14714  
**Principal Investigator:**        Allan Rosenfield (475)

## **Study Description**

---

Previously Paper Protocol 14714
