# Supplementary material
Source: PubMed Central journal article supplement (PMC1952200)
Supplement: pmed.0040257.sd004.pdf [file pmed.0040257.sd004.pdf]

**Columbia University Human Subjects Protocol Data Sheet**

**Protocol: IRB-AAA5282(Y2M00) Renewal**

**Protocol Status: Approved**

**Effective Date: 01/01/2001  
Expiration Date: 12/31/2007**

**Originating Department:** MSPH DEAN'S OFFICE (475-00-47500)  
**Submitting To:** Medical Center  
**Title:** MTCT-Plus Initiative  
**Sponsor Protocol Version#:**  
**Abbreviated title:** MTCT Plus Initiatve

**Affiliated Institutions:**  
**Protocol Begin Date:** 00/00/0000  
**Protocol End Date:** 00/00/0000  
**Previous Protocol Number:** 14714

**Personnel Staff**

| <u>Name/Phone</u>                                        | <u>Role</u>               | <u>COI-Date</u> | <u>Courses</u>                                                           | <u>Dept</u> | <u>Edit/ Procedure View</u> | <u>Experience</u> |
|----------------------------------------------------------|---------------------------|-----------------|--------------------------------------------------------------------------|-------------|-----------------------------|-------------------|
| Allan Rosenfield,<br>(ar32)<br>212-305-3929<br>Professor | Principal<br>Investigator | 09/26/2006      | 1. HS GCP - Epid. & Soc.<br>Behav. - 09/28/2000<br>2. HIPAA - 03/22/2005 | 475         | Edit                        |                   |

|                                                              |           |            |  |     |      |  |
|--------------------------------------------------------------|-----------|------------|--|-----|------|--|
| Jessica Arrighi,<br>(jaw83) (212)<br>342-0535 Admin<br>Coord | Initiator | 08/09/2004 |  | 478 | Edit |  |
|--------------------------------------------------------------|-----------|------------|--|-----|------|--|

|                                                                      |                 |            |                                                                       |     |      |  |
|----------------------------------------------------------------------|-----------------|------------|-----------------------------------------------------------------------|-----|------|--|
| *Wafaa El-sadr,<br>(wme1) 212 939<br>2936 Prof Clin/<br>Assoc Attend | Co-Investigator | 11/07/2006 | 1. HS GCP - Patient/Clinical<br>- 03/19/2001<br>2. HIPAA - 01/02/2004 | 527 | Edit |  |
|----------------------------------------------------------------------|-----------------|------------|-----------------------------------------------------------------------|-----|------|--|

**Renewal**

**Subject Enrollment Status:**  
**Additional relevant information if needed to further explain Study Status:**  
**Date enrollment began at our site:** 00/00/0000  
**Summary of any recent literature or interim findings:**  
**Changes in the literature since the last renewal application:**  
**List of papers pending or published:**  
**Synopsis of the results to date:**  
**If this renewal includes a modification:**  
**Certificate of Confidentiality (COC) obtained:**  
**If COC obtained, expiration date of Certificate:** 00/00/0000

**Subjects**

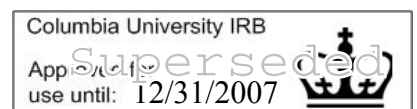

|                                                                           |   |
|---------------------------------------------------------------------------|---|
| Is this a multicenter study?                                              | 0 |
| Target accrual at all sites:                                              | 0 |
| Number of Subjects accrued to date at all sites:                          | 0 |
| Target accrual at this site:                                              | 0 |
| Number accrued to date at this site:                                      | 0 |
| Number completed at this site:                                            | 0 |
| Number still on study at this site:                                       | 0 |
| Number who withdrew of own initiative(including those lost to follow-up): | 0 |
| Number removed by researcher:                                             | 0 |
| Number of subjects accrued since the last IRB approval:                   | 0 |
| Number anticipated to accrue next approval period:                        | 0 |
| Number of subject complaints at this site:                                | 0 |

Explain subject complaints:

Explain subjects removed by researcher:

Explain subjects who withdrew of own initiative:

Explain incomplete accrual at our site:

Explain problems meeting anticipated accrual number:

Strategies to remedy these problems:

Have you enrolled subjects using the Short Form Consent Process for Non-English speaking subjects?:  
Please indicate the number of subjects enrolled for each language:

Subject justification: Previously Paper Protocol 14714

Subject compensation: Previously Paper Protocol 14714

Compensation justification: Previously Paper Protocol 14714

Consent form waiver/alteration request: Previously Paper Protocol 14714

Recruitment url:

Oversight Monitoring/Renewal  
Adverse Event

---

Summary of all Adverse Events to  
date at all sites:

Number of deaths at this site: 0

Has your assessment of risks and  
benefits changed since the last  
submission?:

If Yes, describe assessment of risks  
and benefits:

If there is a Data Safety Monitoring  
Committee for this study, is the most  
recent report attached?:

Explanation why the most recent  
safety monitor report is not attached:

If this is a federally supported or  
multi-center study, is the most recent  
progress report of this study  
attached?:

Explanation why the most recent  
report is not attached:

**Research**

---

Research procedures:

Research facilities:

Scientific abstract: Previously Paper Protocol 14714

Lay abstract: Previously Paper Protocol 14714

**Approval Personnel**

---

*Electronic Signature: Allan Rosenfield (475) - Principal Investigator*  
*Electronic Signature: Wafaa El-sadr (527) - Co-Investigator*

*Date: 00/00/0000 NOT YET SIGNED*  
*Date: 00/00/0000 NOT YET SIGNED*
